# 1 Isolation of bat sarbecoviruses of SARS-CoV-2 clade, Japan

2

3 Shin Murakami\*, Tomoya Kitamura, Hiromichi Matsugo, Haruhiko Kamiki, Ken Oyabu,

4 Wataru Sekine, Akiko Takenaka-Uema, Yuko Sakai-Tagawa, Yoshihiro Kawaoka,

5 Taisuke Horimoto\*

6

7 Author affiliations:

8 The University of Tokyo, Tokyo, Japan (S. Murakami, Matsugo, H. Kamiki, W. Sekine,

9 A. Takenaka-Uema, Y. Sakai-Tagawa, Y. Kawaoka, T. Horimoto); National Agriculture

10 and Food Research Organization (NARO), Tokyo, Japan (T. Kitamura); Isumi

11 County-City Nature Preservation Association, Isumi-gun, Chiba, Japan (K. Oyabu)

12

13 \* Address for correspondence:

14 Shin Murakami, Laboratory of Veterinary Microbiology, Graduate School of

15 Agricultural and Life Sciences, The University of Tokyo, 1-1-1 Yayoi, Bunkyo-ku,

16 Tokyo 113-8657, Japan; email: [shin-murakami@g.ecc.u-tokyo.ac.jp](mailto:shin-murakami@g.ecc.u-tokyo.ac.jp); phone number:

17 +81-3-5841-5398

18

19 Taisuke Horimoto, Laboratory of Veterinary Microbiology, Graduate School of  
20 Agricultural and Life Sciences, The University of Tokyo, 1-1-1 Yayoi, Bunkyo-ku,  
21 Tokyo 113-8657, Japan; email: taihorimoto@g.ecc.u-tokyo.ac.jp  
22 Word count (abstract): 150  
23 Word count (text): 2724  
24

## 25     **ABSTRACT**

26     Betacoronaviruses have caused 3 outbreaks in the past 2 decades. SARS-CoV-2, in  
 27     particular, has caused a serious pandemic. As the betacoronaviruses are considered to  
 28     originate from bats, surveillance of bat betacoronaviruses is crucial for understanding  
 29     the mechanism of cross-species transition and potential for future outbreaks. We  
 30     previously detected and characterized a SARS-CoV-2-related sarbecovirus, Rc-o319,  
 31     from *Rhinolophus cornutus* in Japan. Here, we detected several bat sarbecoviruses of  
 32     the SARS-CoV-2 clade from *R. cornutus* in multiple locations in Japan, and  
 33     successfully isolated them using Vero/TMPRSS2 cells stably expressing *R. cornutus*  
 34     ACE2 (Vero-RcACE2). The coding sequences of S1 region varied among isolates,  
 35     whereas other genetic regions were highly conserved. Isolates were efficiently grown in  
 36     Vero-RcACE2 cells, but did not replicate in Vero/TMPRSS2 cells stably expressing  
 37     human ACE2, suggesting a narrow host range. Further long-term epidemiological  
 38     studies of sarbecoviruses in wildlife are expected to facilitate the assessment of the risk  
 39     of their spillover potential.

40

41             Severe acute respiratory syndrome coronavirus (SARS-CoV), Middle East  
 42     respiratory syndrome coronavirus (MERS-CoV), and SARS-CoV-2 have caused 3

43 outbreaks in human populations in the past 2 decades. In particular, SARS-CoV-2 has  
44 caused a worldwide serious pandemic with devastating damage to human health, many  
45 social activities, and the economy. All these betacoronaviruses are considered to be of  
46 bat origin. Hence, surveillance of bat betacoronaviruses is crucial for understanding and  
47 assessing the spillover potential of betacoronaviruses in humans in the future.

48 SARS-CoV and SARS-CoV-2 belong to the *Betacoronavirus* genus and *Sarbecovirus*  
49 subgenus. Bats belonging to the genus *Rhinolophus* are considered natural reservoirs of  
50 sarbecoviruses, as most have been detected in this bat species in Asian countries such as  
51 China (1-9), Japan (10), South Korea (11, 12), Laos (13), Thailand (14), and Cambodia  
52 (15), as well as in European and African countries such as Bulgaria (16), England (17),  
53 and Kenya (18). Bat sarbecoviruses closely related to SARS-CoV-2 have also been  
54 found in the Yunnan province, China, and Southeast Asian countries (1, 3, 7, 8, 13-15)  
55 with some possessing the ability to bind to the human angiotensin-converting enzyme 2  
56 (ACE2) as an entry receptor, posing a potential for human infection (3, 8, 13).

57 We previously identified a Japanese bat sarbecovirus, Rc-o319, detected from  
58 *Rhinolophus cornutus* bats in the Iwate prefecture, which was shown to  
59 phylogenetically belong to the SARS-CoV-2 lineage. Vesicular stomatitis virus  
60 (VSV)-based pseudotyped virus possessing the Rc-o319 spike (S) protein was able to

61 infect cells expressing *R. cornutus* ACE2 (RcACE2), but not those expressing human  
62 ACE2 (hACE2), suggesting that the Rc-o319 virus uses RcACE2 as its receptor (10).  
63 Sarbecoviruses detected in China and other Asian countries were demonstrated to vary  
64 genetically. However, the distribution and genetic variation of bat sarbecoviruses in  
65 Japan have not yet been determined.

66 Despite the surveillance-based genetic detection of numerous bat  
67 sarbecoviruses, infectious viruses have been limitedly isolated to date. Infectious  
68 viruses are useful and required for understanding the biological characteristics. Here, we  
69 report the detection and isolation of bat sarbecoviruses from several locations in Japan  
70 and their genetic and biological characterization.

71

## 72 **Materials and methods**

### 73 **Cells and virus**

74 Vero/TMPRSS2 cells (19) were kindly provided by Dr. Makoto Takeda, National  
75 Institute of Infectious Diseases, Japan, and maintained in Dulbecco's modified Eagle's  
76 medium (DMEM, Nacalai Tesque, Kyoto, Japan) supplemented with 10 % fetal bovine  
77 serum (FBS), 100 units/mL of penicillin, and 100 µg/mL of streptomycin. Cells were  
78 cultured in 5 % CO<sub>2</sub> at 37 °C. SARS-CoV-2 (B.1.1.7, alpha variant,

79 UT-HP127-1Nf/Human/2021/Tokyo) was propagated in Vero/TMPRSS2 cells, and  
80 aliquots were stored at -80 °C.

81

## 82 **Sample collection**

83 We collected 88 fresh fecal samples, 58 from *Rhinolophus cornutus* and 30 from  
84 *Rhinolophus ferrumequinum* bats living in caves, abandoned mines, or abandoned  
85 tunnels in Niigata, Chiba, and Shizuoka prefectures in Japan (Table 1). When bats were  
86 densely packed during daytime roost, plastic sheets were placed under the roost for 1-2  
87 h. Fresh feces that dropped onto the sheets were collected. When bats were sporadically  
88 placed during daytime roost, we captured bats with permission from the prefectural  
89 local governments (No. 962 for Chiba and No. 311 for Shizuoka) and kept each bat in a  
90 separate nonwoven fabric bag. Feces excreted by the bat in the bag were collected and  
91 bats were released. Fecal samples were transferred into tubes containing  
92 phosphate-buffered saline (PBS) supplemented with 200 U/mL penicillin, 200 µg/mL  
93 streptomycin, and 0.25 µg/mL amphotericin B, and immediately frozen in dry ice.

94

## 95 **Reverse transcription-PCR**

96 RNA was extracted from the fecal samples using the RNeasy PowerMicrobiome Kit

(Qiagen KK, Tokyo, Japan) and the partial E gene of sarbecovirus was detected in RNA samples by real-time reverse transcription-PCR (rRT-PCR) using the RNA-direct SYBR Green Realtime PCR Master Mix (Toyobo, Osaka, Japan) and a pair of primers (5'-TCGGAAGAGACAGGTACGTT-3' and 5'-TCGAAGCGCAGTAAGGATGG-3') that were designed to target a highly conserved region of the sarbecovirus E gene.

102

### 103 **Establishment of ACE2-stably expressing cells**

104 We constructed a plasmid, pCAGGS-blast, by inserting the XhoI-EcoRV fragment of  
105 pMXs-IRES-Bsd (20), which contains the encephalomyocarditis virus internal  
106 ribosomal entry site and blasticidin-resistant gene, into the XhoI and StuI sites of the  
107 pCAGGS-MCS vector. Open reading frame (ORF) sequences of RcACE2 or hACE2  
108 were PCR-amplified from pCAGGS-RcACE2- or pCAGGS-hACE2-expressing  
109 plasmids (10) and cloned into EcoRI- and XhoI-digested pCAGGS-blast plasmids using  
110 NEBuilder (New England Biolabs, Ipswich, MA, USA). Vero/TMPRSS2 cells were  
111 transfected with pCAGGS-blast-RcACE2 or pCAGGS-blast-hACE2 plasmids using the  
112 PEI MAX transfection reagent (Polysciences, Warrington, PA, USA). Transfected cells  
113 were treated with 10 µg/mL blasticidin S (Kaken Pharmaceutical, Tokyo, Japan) 1 d  
114 posttransfection, and blasticidin S-resistant cells were selected and cloned. Highly

115 susceptible cell clones for the pseudotyped viral infection were selected by screening  
116 using GFP-expressing VSV-pseudotyped virus possessing the S protein of Rc-o319 or  
117 SARS-CoV-2 (10), generating RcACE2- or hACE2-stably expressing Vero/TMPRSS2  
118 cells (namely Vero-RcACE2 or Vero-hACE2, respectively).

119

## 120 **Establishment of ACE2-knockout cells**

121 We generated ACE2-knockout Vero/TMPRSS2 cells (Vero-ACE2KO) by knocking out  
122 the corresponding genes using the CRISPR/Cas9 system. The target sequence for the  
123 ACE2 gene (5'-TGCTGCTCAGTCCACCATTG-3') was designed using CRISPR direct  
124 (<https://crispr.dbcls.jp>) and cloned into plentiCRISPR plasmids (21) (Addgene plasmid  
125 #52961, a gift from Dr. Feng Zhang) using NEBuilder (NEB). Vero/TMPRSS2 cells  
126 were transfected with an ACE2-targeting plasmid using PEI MAX (Polysciences). At 24  
127 h posttransfection, the cell supernatant was replaced with medium containing 10 µg/mL  
128 puromycin. Drug-resistant clones were randomly selected and their genomic DNA was  
129 sequenced. Cells possessing insertions or deletions (in/dels) in the targeted gene were  
130 chosen for further analysis.

131

## 132 **Isolation of bat sarbecoviruses**



133 Fecal samples positive for the partial E gene of sarbecovirus were homogenized in  
134 TissueLyser II (Qiagen) using 0.1 mm glass beads (Tomy Seiko, Tokyo, Japan) in PBS  
135 containing 200 U/mL penicillin, 200 µg/mL streptomycin, and 0.25 µg/mL amphotericin  
136 B. The supernatants were collected after centrifugation at  $5000 \times g$  for 5 min at 4 °C  
137 and diluted 100-fold in cell maintenance medium (DMEM supplemented with 1 % FBS,  
138 200 U/mL penicillin, 200 µg/mL streptomycin, and 0.25 µg/mL amphotericin B).  
139 Diluents were inoculated into 6-well plates containing Vero-RcACE2 cells, and plates  
140 were incubated for 60 min at 37 °C after removing the inoculum. Wells were then  
141 washed once with cell maintenance medium, another 2 mL of cell maintenance medium  
142 was added to each well, and incubated at 37 °C. Supernatants from cells that exhibited  
143 cytopathic effects (CPE) were collected at 3–4 d postinoculation and were passed  
144 through a 0.22 µm filter. The successful isolation of viruses was confirmed by rRT-PCR,  
145 and isolates were propagated in Vero -RcACE2 cells, with aliquots being stored at  
146 -80 °C.

147

#### 148 **Next-generation sequencing**

149 A cDNA library was prepared from RNA extracted from bat sarbecoviral isolates using  
150 the TruSeq Stranded Total RNA LT Sample Prep Kit Gold (Illumina, San Diego, CA,

151 USA) for Rc-mk2 and Rc-kw8 strains or the MGIEasy RNA Directional Library Prep  
152 kit (MGI, Shenzhen, China) for the Rc-os20 strain. Libraries of Rc-mk2 and Rc-kw8  
153 strains were sequenced using a Novaseq 6000 sequencer (Illumina), whereas those of  
154 Rc-os20 were sequenced using a DNBSEQ-G400RS (MGI) sequencer. Read sequences  
155 were mapped to the Rc-o319 genome sequence (GenBank accession No. LC556375)  
156 and sarbecoviral sequences were determined using the CLC genomic workbench  
157 version 8.0.1 (Qiagen, <https://www.qiagen.com>) software. The sequences of Rc-os20,  
158 Rc-mk2, and Rc-kw8 have been deposited in GenBank (accession Nos. LC663958,  
159 LC663959, and LC663793, respectively).

160

# 161 **Phylogenetic analysis**

162 The nucleotide sequences of sarbecoviruses were aligned using ClustalW version 2.1  
163 (Clustal, <https://www.clustal.org>). Phylogenetic trees were then constructed by  
164 performing a maximum-likelihood analysis using MEGA version X (22) in combination  
165 with 500 bootstrap replicates.

166

# 167 **Evaluation of viral growth in cells**

168 Cells were inoculated with viruses at a multiplicity of infection (MOI) of 0.01 and

169 allowed for 1 h for viral adsorption. After removing the inocula, cells were incubated in  
170 cell maintenance medium, and the supernatants were collected at 12 h intervals. Viral  
171 titers were measured using a plaque assay, in which cells inoculated with diluted viruses  
172 were overlaid and incubated with DMEM containing 1 % agarose and 1 % FCS for 2 d,  
173 followed by staining with crystal violet before counting plaques.

174

## 175 **Results**

### 176 **Detection of bat sarbecoviruses in Japan**

177 We collected fecal samples from bats belonging to the *Rhinolophus cornutus* and  
178 *Rhinolophus ferrumequinum* species in Niigata, Chiba, and Shizuoka prefectures  
179 (Figure 1). Using real-time RT-PCR, we successfully detected the E gene sequence of  
180 sarbecovirus in 1 or 2 *R. cornutus* samples in each prefecture (Table 1). In contrast, all *R.*  
181 *ferremuquinum* samples were negative. These data suggested that bat sarbecoviruses are  
182 distributed among *R. cornutus* at various locations in Japan.

183

### 184 **Isolation of bat sarbecoviruses from *R. cornutus***

185 In our previous study, we showed that a VSV-based pseudotyped virus possessing the S  
186 protein of the Rc-o319 sarbecovirus from *R. cornutus* only infected RcACE2-expressing

187 cells, but not hACE2- or other *Rhinolophus* ACE2-expressing cells (10), suggesting a  
 188 narrow host range of Rc-o139. Therefore, to isolate bat sarbecoviruses, we established  
 189 RcACE2-stably expressing cells (Vero-RcACE2) based on Vero/TMPRSS2 cells (19),  
 190 which are useful for the isolation of SARS-CoV-2 (23). We inoculated Vero-RcACE2  
 191 cells with RT-PCR-positive fecal samples from each prefecture and observed any  
 192 extensive cytopathic effect (CPE) with syncytium formation at 1–2 d postinoculation  
 193 (Figure 2). Using real-time RT-PCR, we also detected the E gene sequence of  
 194 sarbecovirus in the supernatants at 3–4 d postinoculation. Following filtration, we  
 195 inoculated the supernatants into fresh Vero-RcACE2 cells, and observed for CPE,  
 196 confirming the successful isolation of bat sarbecoviruses. We designated the Niigata,  
 197 Chiba, and Shizuoka isolates, Rc-os20, Rc-mk2, and Rc-kw8, respectively. Using the  
 198 same approach, we further isolated the infectious Rc-o319 isolate.

199

## 200 **Genetic characterization of Japanese isolates**

201 We determined the full genome sequence of all isolates using next-generation  
 202 sequencing. We detected that the sequence of Rc-o319 was identical to the previously  
 203 deposited sequence, which was determined using the Sanger method. Next, we mapped  
 204 the sequence reads of Rc-os20, Rc-mk2, and Rc-kw8 onto the Rc-o319 genome

sequence, and determined their full genomic sequences, which we deposited in GenBank (accession Nos. LC663958, LC663959, and LC663793). We found that sequence homologies were high (ranging 94.8–96.8 %) among all Japanese isolates (Table 2); however, Rc-mk2 and Rc-os20 lacked the entire ORF8 coding region. We also performed similarity plot analysis of entire genome sequence using each isolate as a query, which indicated that the similarities among isolates were high throughout the entire genome sequence, except for coding regions of the N-terminal domain (NTD) and receptor binding domain (RBD) of the S gene, although NTDs of Rc-o319 and Rc-kw8 were conserved (Figure 3A). No clear recombination among the isolates were observed as analyzed by RDP5 software (24). Phylogenetic analysis showed that the Japanese isolates formed a single genetic cluster within the SARS-CoV-2 clade of sarbecoviruses, which might be designated the Japanese clade of bat sarbecoviruses (Figure 3B).

## **Growth kinetics of Japanese isolates in cell culture**

We aligned the receptor binding motif of the S protein of Japanese isolates with that of other sarbecoviruses (Figure 4A). We observed that all isolates had a 9-amino acid deletion in this motif, as previously observed in Rc-o319, and possessed relatively conserved residues with Rc-o319. Therefore, we assumed that the use of hACE2 as an

entry receptor is unlikely in these new Japanese isolates. To test this hypothesis, we compared the replication of Japanese isolates and that of a control SARS-CoV-2 (B.1.1.7, alpha variant) in Vero-RcACE2, Vero-hACE2, Vero-ACE2KO, and Vero/TMPRSS2 cells. We found that the 4 bat isolates replicated well only in Vero-RcACE2, whereas did not replicate in Vero/TMPRSS2, Vero-hACE2, or Vero-ACE2KO cells, suggesting their RcACE2-dependent infectivity. In contrast, we noticed that SARS-CoV-2 replicated efficiently in Vero/TMPRSS2, Vero-RcACE2, and Vero-hACE2 cells, but not in Vero-ACE2KO cells (Figure 4B), suggesting multiple ACE2-dependent infectivity including that of *R. cornutus*. These data suggested that Japanese bat isolates use only RcACE2 as a receptor, showing narrow host specificity.

## Discussion

In this study, we successfully isolated 4 bat sarbecoviruses from *R. cornutus* bats in distinct locations in Japan, using Vero-RcACE2 cells. The origin of SARS-CoV-2 is thought to be a sarbecovirus from *Rhinolophus* spp. bats in southern China and the Indochinese peninsula, as bat viruses detected in these regions have been found to have high homology with SARS-CoV-2 and to be able to efficiently bind to human ACE2 (1, 3, 7, 8, 13-15). In contrast, the Japanese bat sarbecovirus isolates were

241 phylogenetically distant from SARS-CoV-2, compared with bat sarbecoviruses from  
242 southern China and the Indochinese peninsula, despite belonging to the SARS-CoV-2  
243 clade. In addition, the Japanese bat isolates were unable to use hACE2 as a cell entry  
244 receptor, thus making it unlikely to be one of the ancestors of SARS-CoV-2. However,  
245 phylogenetic analysis indicated that the Japanese viruses were positioned near a  
246 branching node between the SARS-CoV and SARS-CoV-2 clades, suggesting that they  
247 might be related to the common ancestor of SARS-CoV and SARS-CoV-2. These  
248 findings suggested that characterization of bat viruses might provide an understanding  
249 of the mechanism and the potential of bat sarbecoviruses to overcome host barriers.

250       Because of the pilot study aspect of this study, the number of samples and the  
251 bat species studied were limited. Four species of *Rhinolophus* bats inhabit Japan: *R.*  
252 *cornutus*, *R. ferrumequinum*, *R. pumilus*, and *R. perditus*. The former 2 species are  
253 widely distributed, exhibiting a major population in Japan, whereas the latter 2 species  
254 are mainly confined in Okinawa prefecture, which is located far southwest of the main  
255 island of Japan. In this study, the bat sarbecoviruses were isolated from *R. cornutus* but  
256 not from *R. ferrumequinum*. Since the virus has been detected from *R. ferrumequinum*  
257 in China (5), it is expected that increasing the number of samples will clarify whether *R.*  
258 *ferrumequinum*-associated virus exists in Japan. Although there have been no reports

259 of sarbecovirus detection in *R. pumilus* and *R. perditus*, it is likely that both species  
260 might harbor sarbecoviruses with different genetic characteristics from the isolates in  
261 our study because of their different niche. Further epidemiological surveys are needed  
262 to confirm this hypothesis.

263 Virus isolates can be used to elucidate their biological characteristics, including  
264 pathogenicity and antigenicity. To this date, all detected bat sarbecoviruses are classified  
265 into 2 groups based on receptor selectivity: hACE2-binding and non-hACE2-binding  
266 types. In particular, hACE2-binding type bat sarbecoviruses were isolated from African  
267 green monkey Vero cells, whose ACE2 molecule might be functionally related to  
268 hACE2 (9). In contrast, to the best of our knowledge, non-hACE2-binding type bat  
269 sarbecoviruses have not been isolated. Comparative analysis between hACE2-binding  
270 and non-hACE2-binding viruses would facilitate an understanding of the factors that  
271 determine receptor specificity of bat sarbecoviruses.

272 Both the NTD and RBD of the S protein were highly variable among  
273 sarbecoviruses (25-28), probably due to escape from immune pressure, as both regions  
274 contain viral neutralizing epitopes (29-31). *Rhinolophus* spp. bats are relatively  
275 short-distance migrants (32, 33); hence, the migration of individuals between bat groups  
276 is infrequent. Most genome sequences, except for the RBD- and NTD-coding regions of



277 the S gene, were highly conserved among Japanese strains, suggesting that Japanese  
278 sarbecoviruses diverged relatively recently from the undefined ancestral virus, and  
279 consecutively rapidly accumulated mutations in the NTD and RBD regions due to  
280 strong selection pressure. Several studies have been reported that in addition to  
281 sarbecoviruses *Rhinolophus* bats harbor alphacoronaviruses (8, 34), suggesting that a  
282 virus could undergo major changes by recombination with other coronaviruses in the  
283 NTD/RBD regions, leading to the emergence of a novel coronavirus with zoonotic  
284 potential.

285 Various sarbecoviruses lacking ORF8 protein have been identified in bats (6,  
286 35) and humans (36, 37). Although the function of ORF8 protein in SARS-CoV-2 is not  
287 fully understood, it might act as an inhibitor of IFN-I signaling (38) and a  
288 downregulator of MHC-I (39). Hence, an ORF8-deleted virus shows lower  
289 pathogenicity in humans (40). Among our bat isolates, 2 strains possessed the ORF8  
290 gene, but their homology to that of SARS-CoV-2 was very low (approximately 27.5 %  
291 in amino acid sequence), suggesting functional differences. Likewise, no appreciable  
292 difference was detected in growth in cell culture between viruses possessing or lacking  
293 ORF8 protein (e.g., Rc-o319 versus Rc-os20). Further studies are required to clarify the  
294 biological characteristics of ORF8 protein in bat sarbecoviruses.

295 In conclusion, we isolated bat sarbecoviruses from *R. cornutus* in several  
 296 locations in Japan that were phylogenetically positioned in the same cluster of the  
 297 SARS-CoV-2 clade. These isolates did not replicate in hACE2-expressing cells,  
 298 suggesting low potential for human infection. However, sarbecoviruses might mutate  
 299 and infect humans via intermediate hosts in wildlife or livestock. Therefore,  
 300 epidemiological studies of sarbecoviruses in wildlife, including bats, need to be  
 301 conducted on a long-term basis for risk assessment of their zoonotic potential.

302

303 Dr. Murakami is an associate professor at the Graduate School of Agricultural and Life  
 304 Sciences, University of Tokyo, Tokyo, Japan. His research interests include  
 305 epidemiologic and molecular biological studies of animal viruses, including  
 306 coronaviruses and influenza viruses.

307

### 308 **Acknowledgements**

309 This work was supported by the Japan Agency for Medical Research and Development  
 310 (AMED) under the grant number JP21fk0108615. We thank Ms. Satomi Kato for the  
 311 technical assistance.

312

### 313 **Disclosure statement**

314 The author(s) declare that they have no potential conflict of interest.

315

### 316 **References**

- 317 1. Li LL, Wang JL, Ma XH, Sun XM, Li JS, Yang XF, et al. A novel SARS-CoV-2  
318 related coronavirus with complex recombination isolated from bats in Yunnan province,  
319 China. *Emerg Microbes Infect.* 2021 Dec;10(1):1683-90.
- 320 2. Guo H, Hu B, Si HR, Zhu Y, Zhang W, Li B, et al. Identification of a novel  
321 lineage bat SARS-related coronaviruses that use bat ACE2 receptor. *Emerg Microbes*  
322 *Infect.* 2021 Dec;10(1):1507-14.
- 323 3. Zhou P, Yang XL, Wang XG, Hu B, Zhang L, Zhang W, et al. A pneumonia  
324 outbreak associated with a new coronavirus of probable bat origin. *Nature.* 2020  
325 Mar;579(7798):270-3.
- 326 4. Lau SK, Woo PC, Li KS, Huang Y, Tsoi HW, Wong BH, et al. Severe acute  
327 respiratory syndrome coronavirus-like virus in Chinese horseshoe bats. *Proc Natl Acad*  
328 *Sci U S A.* 2005 Sep;102(39):14040-5.
- 329 5. Li W, Shi Z, Yu M, Ren W, Smith C, Epstein JH, et al. Bats are natural  
330 reservoirs of SARS-like coronaviruses. *Science.* 2005 Oct;310(5748):676-9.

- 331 6. Hu B, Zeng LP, Yang XL, Ge XY, Zhang W, Li B, et al. Discovery of a rich  
332 gene pool of bat SARS-related coronaviruses provides new insights into the origin of  
333 SARS coronavirus. PLoS Pathog. 2017 Nov;13(11):e1006698.
- 334 7. Zhou H, Chen X, Hu T, Li J, Song H, Liu Y, et al. A novel bat coronavirus  
335 closely related to SARS-CoV-2 contains natural insertions at the S1/S2 cleavage site of  
336 the spike protein. Current Biology. 2020 Jun;30(11):2196-203.e3.
- 337 8. Zhou H, Ji J, Chen X, Bi Y, Li J, Wang Q, et al. Identification of novel bat  
338 coronaviruses sheds light on the evolutionary origins of SARS-CoV-2 and related  
339 viruses. Cell. Aug;184(17):4380-91.e14.
- 340 9. Ge XY, Li JL, Yang XL, Chmura AA, Zhu G, Epstein JH, et al. Isolation and  
341 characterization of a bat SARS-like coronavirus that uses the ACE2 receptor. Nature.  
342 2013 Nov;503(7477):535-8.
- 343 10. Murakami S, Kitamura T, Suzuki J, Sato R, Aoi T, Fujii M, et al. Detection and  
344 Characterization of Bat Sarbecovirus Phylogenetically Related to SARS-CoV-2, Japan.  
345 Emerg Infect Dis. 2020 Dec;26(12):3025-9.
- 346 11. Kim Y, Son K, Kim Y-S, Lee S-Y, Jheong W, Oem J-K. Complete genome  
347 analysis of a SARS-like bat coronavirus identified in the Republic of Korea. Virus  
348 Genes. 2019 Aug;55(4):545-9.

- 349 12. Lo VT, Yoon SW, Noh JY, Kim Y, Choi YG, Jeong DG, et al. Long-term  
350 surveillance of bat coronaviruses in Korea: Diversity and distribution pattern.  
351 Transbound Emerg Dis. 2020 Nov;67(6):2839-48.
- 352 13. Temmam S, Vongphayloth K, Baquero E, Munier S, Bonomi M, Regnault B, et  
353 al. Bat coronaviruses related to SARS-CoV-2 and infectious for human cells. Nature.  
354 2022 Apr;604(7905):330-6.
- 355 14. Wacharapluesadee S, Tan CW, Maneerorn P, Duengkhae P, Zhu F, Joyjinda Y, et  
356 al. Evidence for SARS-CoV-2 related coronaviruses circulating in bats and pangolins in  
357 Southeast Asia. Nat Commun. 2021 Feb;12(1):972.
- 358 15. Delaune D, Hul V, Karlsson EA, Hassanin A, Ou TP, Baidaliuk A, et al. A  
359 novel SARS-CoV-2 related coronavirus in bats from Cambodia. Nat Commun. 2021  
360 Dec;12(1):6563.
- 361 16. Drexler JF, Gloza-Rausch F, Glende J, Corman VM, Muth D, Goettsche M, et  
362 al. Genomic characterization of severe acute respiratory syndrome-related coronavirus  
363 in European bats and classification of coronaviruses based on partial RNA-dependent  
364 RNA polymerase gene sequences. J Virol. 2010 Nov;84(21):11336-49.
- 365 17. Crook JM, Murphy I, Carter DP, Pullan ST, Carroll M, Vipond R, et al.  
366 Metagenomic identification of a new sarbecovirus from horseshoe bats in Europe. Sci

- 367 Rep. 2021Dec;11(1):14723.
- 368 18. Tao Y, Tong S. Complete Genome Sequence of a Severe Acute Respiratory  
369 Syndrome-Related Coronavirus from Kenyan Bats. Microbiol Resour Announc. 2019  
370 Jul;8(28):e00548-19.
- 371 20. Shirogane Y, Takeda M, Iwasaki M, Ishiguro N, Takeuchi H, Nakatsu Y, et al.  
372 Efficient multiplication of human metapneumovirus in Vero cells expressing the  
373 transmembrane serine protease TMPRSS2. J Virol. 2008 Sep;82(17):8942-6.
- 374 21. Kitamura T, Koshino Y, Shibata F, Oki T, Nakajima H, Nosaka T, et al.  
375 Retrovirus-mediated gene transfer and expression cloning: powerful tools in functional  
376 genomics. Exp Hematol. 2003 Nov;31(11):1007-14.
- 377 22. Sanjana NE, Shalem O, Zhang F. Improved vectors and genome-wide libraries  
378 for CRISPR screening. Nat Methods. 2014 Aug;11(8):783-4.
- 379 23. Kumar S, Stecher G, Li M, Knyaz C, Tamura K. MEGA X: Molecular  
380 evolutionary genetics analysis across computing platforms. Mol Biol Evol. 2018  
381 06;35(6):1547-9.
- 382 24. Matsuyama S, Nao N, Shirato K, Kawase M, Saito S, Takayama I, et al.  
383 Enhanced isolation of SARS-CoV-2 by TMPRSS2-expressing cells. Proc Natl Acad Sci  
384 U S A. 2020 Mar;117(13):7001-3.

- 385 25. Martin DP, Varsani A, Roumagnac P, Botha G, Maslamoney S, Schwab T, et al.  
386 RDP5: a computer program for analyzing recombination in, and removing signals of  
387 recombination from, nucleotide sequence datasets. *Virus Evol.* 2021 Jan;7(1):veaa087.
- 388 26. Wec AZ, Wrapp D, Herbert AS, Maurer DP, Haslwanter D, Sakharkar M, et al.  
389 Broad neutralization of SARS-related viruses by human monoclonal antibodies. *Science*.  
390 2020 Aug;369(6504):731-6.
- 391 27. Pinto D, Park Y-J, Beltramello M, Walls AC, Tortorici MA, Bianchi S, et al.  
392 Cross-neutralization of SARS-CoV-2 by a human monoclonal SARS-CoV antibody.  
393 *Nature*. 2020 Jul;583(7815):290-5.
- 394 28. Rappazzo CG, Tse LV, Kaku CI, Wrapp D, Sakharkar M, Huang D, et al. Broad  
395 and potent activity against SARS-like viruses by an engineered human monoclonal  
396 antibody. *Science*. 2021 Feb;371(6531):823-9.
- 397 29. Onodera T, Kita S, Adachi Y, Moriyama S, Sato A, Nomura T, et al. A  
398 SARS-CoV-2 antibody broadly neutralizes SARS-related coronaviruses and variants by  
399 coordinated recognition of a virus-vulnerable site. *Immunity*. 2021  
400 Oct;54(10):2385-98.e10.
- 401 30. Suryadevara N, Shrihari S, Gilchuk P, Vanblargan LA, Binshtein E, Zost SJ, et  
402 al. Neutralizing and protective human monoclonal antibodies recognizing the

403 N-terminal domain of the SARS-CoV-2 spike protein. Cell. 2021  
404 Apr;184(9):2316-31.e15.

405 31. Mccallum M, De Marco A, Lempp FA, Tortorici MA, Pinto D, Walls AC, et al.  
406 N-terminal domain antigenic mapping reveals a site of vulnerability for SARS-CoV-2.  
407 Cell. 2021 Apr;184(9):2332-47.e16.

408 32. Liu L, Wang P, Nair MS, Yu J, Rapp M, Wang Q, et al. Potent neutralizing  
409 antibodies against multiple epitopes on SARS-CoV-2 spike. Nature. 2020  
410 Aug;584(7821):450-6.

411 33. Jones G, Duverge PL, Ransome RD. Conservation biology of an endangered  
412 species: Field studies of greater horseshoe bats. Sym Zool S. 1995(67):309-24.

413 34. Bontadina F, Schofield H, Naef-Daenzer B. Radio-tracking reveals that lesser  
414 horseshoe bats (*Rhinolophus hipposideros*) forage in woodland. J Zool. 2002  
415 Nov;258:281-90.

416 35. Lau SKP, Wong ACP, Zhang L, Luk HKH, Kwok JSL, Ahmed SS, et al. Novel  
417 Bat Alphacoronaviruses in Southern China Support Chinese Horseshoe Bats as an  
418 Important Reservoir for Potential Novel Coronaviruses. Viruses. 2019 May;11(5):423.

419 36. Wu Z, Yang L, Ren X, Zhang J, Yang F, Zhang S, et al. ORF8-Related Genetic  
420 Evidence for Chinese Horseshoe Bats as the Source of Human Severe Acute



421 Respiratory Syndrome Coronavirus. *J Infect Dis.* 2016 Feb;213(4):579-83.

422 37. Gong Y-N, Tsao K-C, Hsiao M-J, Huang C-G, Huang P-N, Huang P-W, et al.

423 SARS-CoV-2 genomic surveillance in Taiwan revealed novel ORF8-deletion mutant

424 and clade possibly associated with infections in Middle East. *Emerg Microbes Infect.*

425 2020 Jan;9(1):1457-66.

426 38. Su YCF, Anderson DE, Young BE, Linster M, Zhu F, Jayakumar J, et al.

427 Discovery and Genomic Characterization of a 382-Nucleotide Deletion in ORF7b and

428 ORF8 during the Early Evolution of SARS-CoV-2. *mBio.* 2020 Jul 21;11(4):e01610-20.

429 39. Li JY, Liao CH, Wang Q, Tan YJ, Luo R, Qiu Y, et al. The ORF6, ORF8 and

430 nucleocapsid proteins of SARS-CoV-2 inhibit type I interferon signaling pathway. *Virus*

431 *Res.* 2020 Sep;286:198074.

432 40. Zhang Y, Chen Y, Li Y, Huang F, Luo B, Yuan Y, et al. The ORF8 protein of

433 SARS-CoV-2 mediates immune evasion through down-regulating MHC-I. *Proc Natl*

434 *Acad Sci U S A.* 2021 Jun;118(23):e2024202118.

435 41. Young BE, Fong S-W, Chan Y-H, Mak T-M, Ang LW, Anderson DE, et al.

436 Effects of a major deletion in the SARS-CoV-2 genome on the severity of infection and

437 the inflammatory response: an observational cohort study. *The Lancet.* 2020

438 Aug;396(10251):603-11.

439

440

441

## 442 **Figure legends**

443 **Figure 1.** Sampling locations in Japan. Prefectures, where bats were captured, are  
444 indicated in red. Prefectures, where bat sarbecoviruses were detected in our previous  
445 study, are indicated in grey.

446

447 **Figure 2.** Images of bat sarbecovirus-inoculated cells. Vero-RcACE2 cells were  
448 inoculated with fecal samples from *Rhinolophus cornutus* from several prefectures of  
449 Japan. After 1–2 d of inoculation, cytopathic effects with extensive syncytium formation  
450 (arrow heads) were observed. Scale bar, 200  $\mu$ m.

451

452 **Figure 3.** Genetic analysis of bat sarbecovirus isolates in Japan. (A) Similarity plot  
453 analysis of isolates was performed using the full-length genome sequence of Rc-o319,  
454 Rc-os20, Rc-kw8, or Rc-mk2 as query. SARS-CoV-2 virus was used as a reference. (B)  
455 Phylogenetic tree of bat sarbecoviruses was generated using the full genome nucleotide  
456 sequences with the maximum-likelihood analysis combined with 500 bootstrap

457 replicates. Red text indicates the isolates in this study. Bootstrap values are shown  
458 above and to the left of the major nodes. Scale bars indicate nucleotide substitutions per  
459 site.

460

461 **Figure 4.** Receptor binding motif (RBM) and growth kinetics of bat sarbecovirus  
462 isolates. (A) Alignment of the RBM sequence of S proteins. Amino acid positions of  
463 RBMs contacting human ACE2 identified in SARS-CoV-2 are shaded in yellow, while  
464 residues identical to SARS-CoV or SARS-CoV-2 are shown in red. Strains that are  
465 capable to bind to human ACE2 are shaded in orange, whereas those that are incapable  
466 to bind to human ACE2 are given in blue. (B) Growth kinetics of isolates. Bat isolates  
467 Rc-o319, Rc-os20, Rc-mk2, and Rc-kw8 or SARS-CoV-2 (B.1.1.7) were inoculated into  
468 Vero/TMPRSS2 (WT), Vero-RcACE2 (RcACE2), Vero-hACE2 (hACE2), or  
469 Vero-ACE2KO (ACE2KO) cells at an MOI of 0.01. The culture supernatants were  
470 collected at the indicated time points, and viral titers were determined using a plaque  
471 assay. Data were reported as the mean titer with standard deviations from 3 independent  
472 experiments.

473

**Table 1 Detection of sarbecoviruses in Japan using RT-PCR**

| Location | Bat species             | Number of samples | Number of positive RT-PCR samples* |
|----------|-------------------------|-------------------|------------------------------------|
| Niigata  | <i>R. cornutus</i>      | 26                | 2                                  |
|          | <i>R. ferrumequinum</i> | 1                 | 0                                  |
| Chiba    | <i>R. cornutus</i>      | 11                | 1                                  |
|          | <i>R. ferrumequinum</i> | 16                | 0                                  |
| Shizuoka | <i>R. cornutus</i>      | 21                | 2                                  |
|          | <i>R. ferrumequinum</i> | 13                | 0                                  |

\*RT-PCR was performed using sarbecovirus consensus primers targeting the E gene.

**Table 2** Full genome nucleotide identity among Japanese isolates

|            | Rc-o319 | Rc-os20 | Rc-kw8 | Rc-mk2 |
|------------|---------|---------|--------|--------|
| Rc-o319    | -       | 95.6 %  | 96.8 % | 94.8 % |
| Rc-os20    | -       | -       | 95.4 % | 95.4 % |
| Rc-kw8     | -       | -       | -      | 95.1 % |
| SARS-CoV-2 | 81.5 %  | 80.7 %  | 81.4 % | 80.7 % |

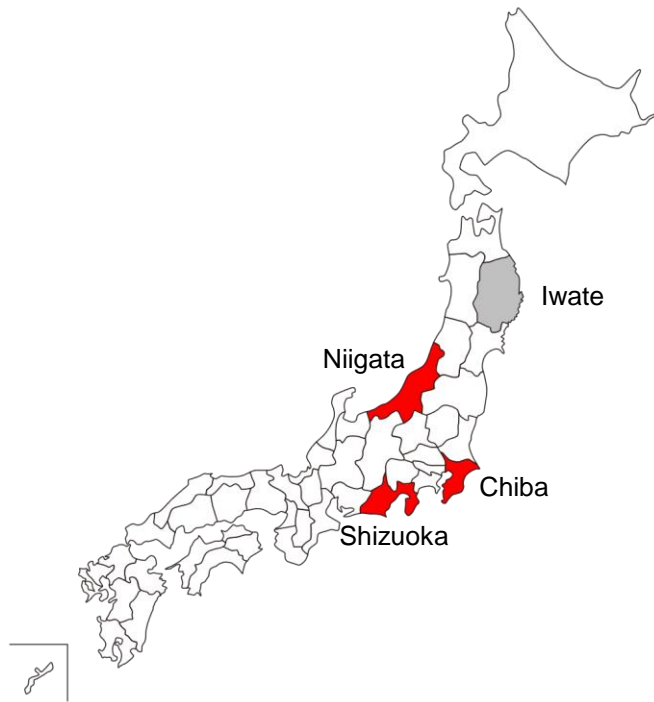

Fig. 1

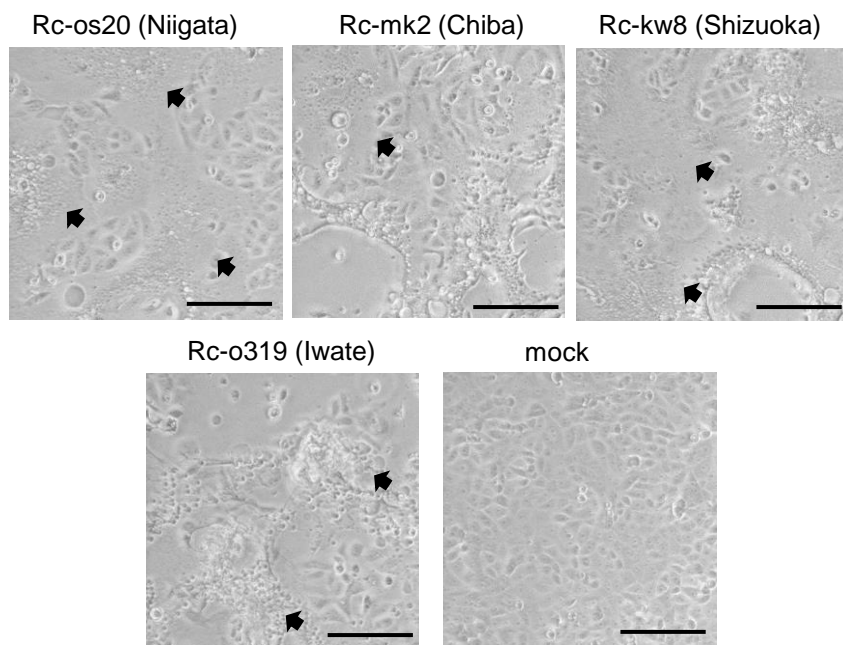

Fig. 2

A

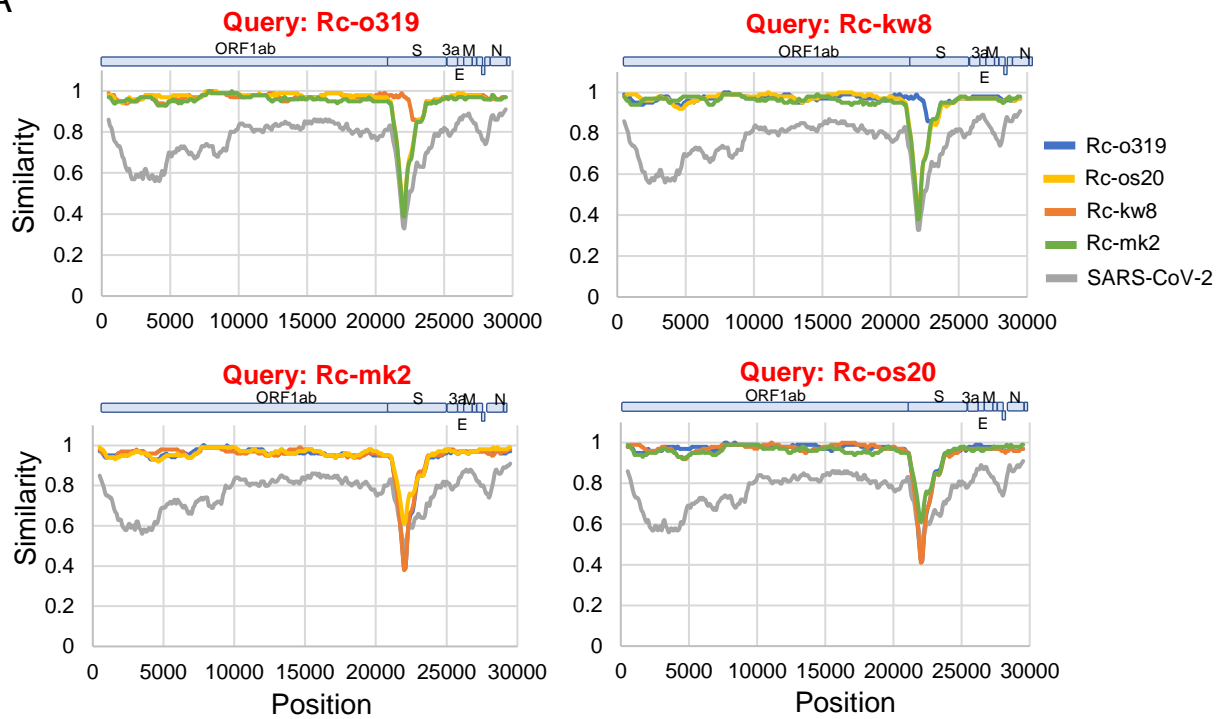

B

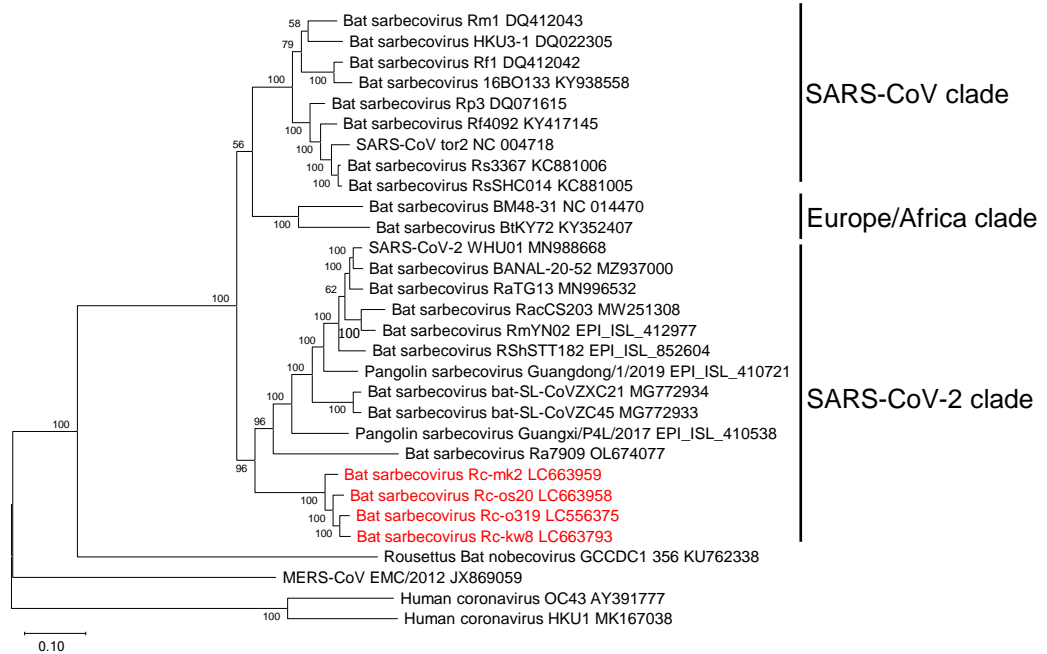

Fig. 3



A

|                 |                                                                               |
|-----------------|-------------------------------------------------------------------------------|
| Bat Rc-o319     | 413:SRNQDASTSGNFNYVRIWRSEKLRPFERDIAHYDYQVGTQFKS-----SLKNYGFYSSAGDSHQPY        |
| Bat Rc-os20     | 430:SKDKDATSSGNYNYLYRMWRPAKLNPFERDIAHYNYLVGVQNK-----TLRYRGFFSTSGTGKLPY        |
| Bat Rc-kw8      | 411:NSKAQDAIGINYNYRYRIWRSSKLNPFERDVGVDYTVGGQQR-----TIKSYTFTSTVGVDYQPY         |
| Bat Rc-mk2      | 426:TKTQDSSQSGNFNYYSRWRPSKLNPFERDIAHYTHSVGGVQKS-----TLTSYGFYSTAGVGYPY         |
| SARS-CoV-2      | 439:SNNLDSKVGGNYNLYRLFRKSNLKPFERDISTEIQAGSTPCNGVEGFNCYFPLQSYGFQPTNGVGYPY      |
| Bat BANAL-20-52 | 438:SNNLDSKVGGNYNLYRLFRKSNLKPFERDISTEIQAGSTPCNGVEGFNCYFPLQSYGFHPTNGVGYPY      |
| Bat RaTG13      | 439:SKHIDAKEGGNFNYLYRLFRKANLKPFERDISTEIQAGSKPCNGQTGLNCYYPYRYGFYPTDGVGHQPY     |
| SARS-CoV        | 426:TRNIDATSTGNYNKYRYRLRHGKLRPFERDISNVFSPDGKPCTP-PALNCYWPLNDYGFYTTTGIGYPY     |
| Bat Rs3367      | 427:TRNIDATQTGNYNKYRSLRHGKLRPFERDISNVFSPDGKPCTP-PAFNCYWPLNDYGFYITNGIGYPY      |
| Bat CoVZXC21    | 434:TAKQDTG-----HYFYRSHRSTKLKPFERDLSSDE-----NGVRTLSTYDFNPNVPLEYQAT            |
| Bat Rp3         | 430:TAKQDQG-----QYYRSHRSTKLKPFERDLSSDE-----NGVRTLSTYDFYPSVPVAYQAT             |
| Bat Rm1         | 430:TAKQDQG-----QYYRSYRKEKLKPFERDLSSDE-----NGVYTLSTYDFYPSIPVEYQAT             |
| Bat HKU3-1      | 430:TAKHDTG-----NYYRSHRSTKLKPFERDLSSDDG-----NGVYTLSTYDFNPNVPAVAYQAT           |
| Bat Rf1         | 430:TAKQDVG-----SYFYRSHRSSKLKPFERDLSSDE-----NGVRTLSTYDFNQNVPLEYQAT            |
| Bat Rf4092      | 423:TAKQDVG-----SYFYRSHRSSKLKPFERDLSSDE-----NGVRTLSTYDFNPNVPLDYQAT            |
| Bat Ra7909      | 425:SKAKDE-----NGQYFYRLFRKSKLLPFQORDVSNVTYSGKNDGCPNSEADCYWPLLLKYGFTGSVSQDYQPY |
| Bat BM48-31     | 431:TNSLDSSN-----EFFYRRFRHGKIKPYGRDLSNVLFNPSGGTCSAEG-LNCYKPLASYGFTQSSGIGFYQPY |

Human ACE2 binding +

Human ACE2 binding -

B

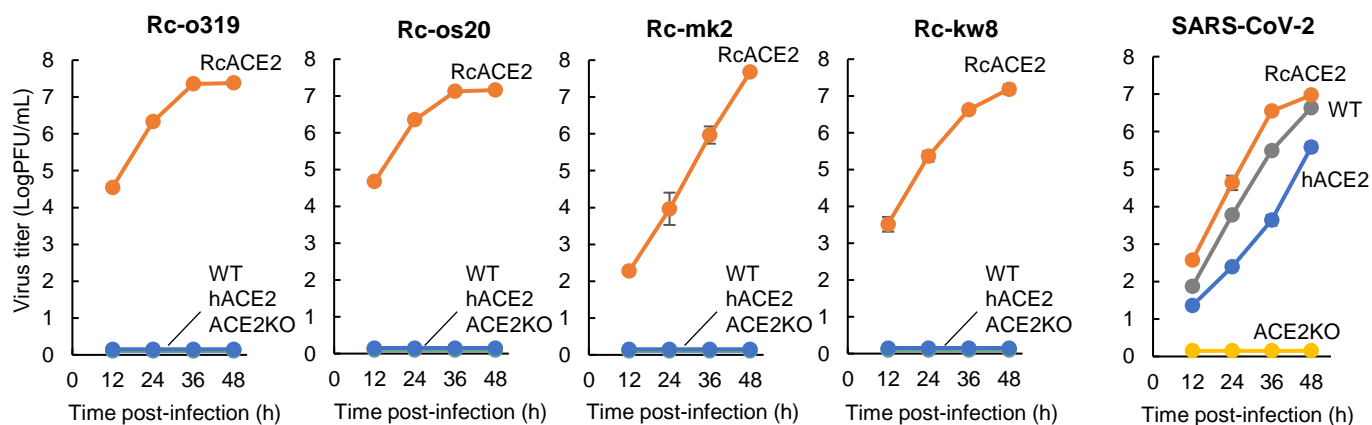

Fig. 4
